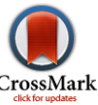

# Linking Annual N<sub>2</sub>O Emission in Organic Soils to Mineral Nitrogen Input as Estimated by Heterotrophic Respiration and Soil C/N Ratio

Zhijian Mu<sup>1\*</sup>, Aiying Huang<sup>2</sup>, Jiupai Ni<sup>3</sup>, Deti Xie<sup>3</sup>

**1** Chongqing Key Laboratory of Soil Multi-scale Interfacial Processes, College of Resources & Environment, Southwest University, Chongqing, China, **2** College of Agronomy & Biotechnology, Southwest University, Chongqing, China, **3** Chongqing Engineering Research Center for Agricultural Non-point Source Pollution Control in Three Gorges Region, College of Resources & Environment, Southwest University, Chongqing, China

## Abstract

Organic soils are an important source of N<sub>2</sub>O, but global estimates of these fluxes remain uncertain because measurements are sparse. We tested the hypothesis that N<sub>2</sub>O fluxes can be predicted from estimates of mineral nitrogen input, calculated from readily-available measurements of CO<sub>2</sub> flux and soil C/N ratio. From studies of organic soils throughout the world, we compiled a data set of annual CO<sub>2</sub> and N<sub>2</sub>O fluxes which were measured concurrently. The input of soil mineral nitrogen in these studies was estimated from applied fertilizer nitrogen and organic nitrogen mineralization. The latter was calculated by dividing the rate of soil heterotrophic respiration by soil C/N ratio. This index of mineral nitrogen input explained up to 69% of the overall variability of N<sub>2</sub>O fluxes, whereas CO<sub>2</sub> flux or soil C/N ratio alone explained only 49% and 36% of the variability, respectively. Including water table level in the model, along with mineral nitrogen input, further improved the model with the explanatory proportion of variability in N<sub>2</sub>O flux increasing to 75%. Unlike grassland or cropland soils, forest soils were evidently nitrogen-limited, so water table level had no significant effect on N<sub>2</sub>O flux. Our proposed approach, which uses the product of soil-derived CO<sub>2</sub> flux and the inverse of soil C/N ratio as a proxy for nitrogen mineralization, shows promise for estimating regional or global N<sub>2</sub>O fluxes from organic soils, although some further enhancements may be warranted.

**Citation:** Mu Z, Huang A, Ni J, Xie D (2014) Linking Annual N<sub>2</sub>O Emission in Organic Soils to Mineral Nitrogen Input as Estimated by Heterotrophic Respiration and Soil C/N Ratio. PLoS ONE 9(5): e96572. doi:10.1371/journal.pone.0096572

**Editor:** Shuijin Hu, North Carolina State University, United States of America

**Received:** January 31, 2014; **Accepted:** April 9, 2014; **Published:** May 5, 2014

**Copyright:** © 2014 Mu et al. This is an open-access article distributed under the terms of the Creative Commons Attribution License, which permits unrestricted use, distribution, and reproduction in any medium, provided the original author and source are credited.

**Funding:** This research was supported by the National Natural Science Foundation of China (grant number 41371211) and the National Major Science and Technology Projects for Water Pollution Control and Management (grant number 2012ZX07104-003). The funders had no role in study design, data collection and analysis, decision to publish, or preparation of the manuscript.

**Competing Interests:** The authors have declared that no competing interests exist.

\* E-mail: muzj01@gmail.com

## Introduction

Although organic soils occupy only 3% of the Earth's land area, they contain approximately 40% (610 Pg) of the terrestrial soil organic carbon (SOC) [1]. Climate warming and human disturbance such as drainage and cultivation are expected to accelerate carbon decomposition in organic soils, and the decomposition of SOC can facilitate the release of mineral nitrogen which can then be utilized by denitrifying and nitrifying bacteria to produce the potent greenhouse gas N<sub>2</sub>O [2,3]. N<sub>2</sub>O emissions from organic soils under agricultural use in Nordic countries were on average four times higher than those from mineral soils, indicating that N<sub>2</sub>O derived from SOC decomposition dominates overall fluxes [4]. However, no consistent and quantitative relationship has been reported for N<sub>2</sub>O emission and organic carbon decomposition in organic soils.

Organic carbon and nitrogen in soils, plant and microbial biomass are usually covalently bonded at relatively constant ratios. It is thus logical to expect that N<sub>2</sub>O and CO<sub>2</sub> originated from SOC decomposition should be closely linked. Some studies have indeed found a significant relationship between soil N<sub>2</sub>O and CO<sub>2</sub> emissions at the site level [5,6]. This relationship, however, was weaker when data were pooled across sites or ecosystems [7,8]. The

variability of soil C/N ratio may be one of the important factors undermining the correlation for organic soils. The C/N ratio in organic soils ranges from 50~100 in weakly decomposed peat to 12~35 in highly decomposed peat [9]. The supply of mineral nitrogen from SOC decomposition is the outcome of two concurrent and oppositely directed microbial processes – nitrogen mineralization and immobilization [10]. Soils with a high C/N ratio may be characterized by rapid immobilization of nitrogen and soils with a low C/N ratio by higher net nitrogen mineralization and a surplus of available NH<sub>4</sub><sup>+</sup> and NO<sub>3</sub><sup>-</sup> [11]. A negative relationship has accordingly been shown for C/N ratio of soils and N<sub>2</sub>O fluxes [9]. Similar to the relationship between N<sub>2</sub>O and CO<sub>2</sub> emissions, the correlation of N<sub>2</sub>O emission with soil C/N ratio tended to be weak when the data from different sites at larger scales were included [4,12], which makes it difficult to scale up N<sub>2</sub>O fluxes by CO<sub>2</sub> emissions or C/N ratio alone from individual sites to regional scales. In view of the coupling of soil carbon and nitrogen processes and the bridging function of C/N ratio, we hypothesized that a combination of soil CO<sub>2</sub> emission and C/N ratio would likely provide better measurements of N<sub>2</sub>O emission at larger scales. In fact, Mu et al. [13] have linked N<sub>2</sub>O flux to soil mineral nitrogen as estimated by CO<sub>2</sub> emission and C/N ratio for agricultural mineral soils. To our knowledge, no such

kind of attempt has ever been made for organic soils. The aim of this study was therefore to determine: 1) if N<sub>2</sub>O flux from organic soils is related to soil mineral nitrogen input estimated from heterotrophic respiration divided by soil C/N ratio (a derived measure of soil nitrogen mineralization) plus fertilizer nitrogen; and 2) whether or not the relationship is sufficiently robust to serve as an approach for estimating N<sub>2</sub>O flux from organic soils.

## Materials and Methods

### Data source

To test the hypothesis, we collected journal-published data of N<sub>2</sub>O and CO<sub>2</sub> emissions measured simultaneously in the fields on peatlands or histosols for which the carbon and nitrogen content or ratio of the organic matter in the upper layers of the soil has been reported. Occasional and short-period flux measurements were not used and only data on annual emissions were considered. For long-term measurements, we used annual estimates rather than multi-year averages to reflect temporal variability. Annual emissions were directly reported by authors or estimated from points in the figures of publications. The final dataset comprised of 122 field measurements from 28 geographical sites (Table S1). Of all data, only 12 measurements at 9 sites were from the tropical regions and the rest were from the temperate regions. Most of the flux measurements were made using closed chamber technique with sampling frequency varying from 1–3 times per week to once per month. Other factors such as soil pH and water table level, if reported, were also recorded in the database. Readers should refer to the original papers for a more complete presentation of the data.

### Estimation of soil mineral nitrogen input

The CO<sub>2</sub> emission measured in bare soils can be taken as the proxy of SOC decomposition or heterotrophic respiration [14]. There are limited studies in which CO<sub>2</sub> emission was measured in bare soils (Table S1). For the CO<sub>2</sub> emissions measured in soils with plants, the contribution of heterotrophic respiration or SOC decomposition was estimated using the following equation adapted from Bond-Lamberty and Thomson [15]:

$$R_h = 10e^{[0.22 + 0.87 \ln(R_t/10)]} \quad (1)$$

where  $R_h$  is heterotrophic respiration and  $R_t$  is total soil respiration (kg C ha<sup>-1</sup> yr<sup>-1</sup>).

The nitrogen mineralization rate from soil organic matter was then calculated using the following equation [13]:

$$N_m = R_h / S_{CN} \quad (2)$$

where  $N_m$  is the gross nitrogen mineralization (kg N ha<sup>-1</sup> yr<sup>-1</sup>) and  $S_{CN}$  is soil C/N ratio.

The mineralized nitrogen from soil organic matter decomposition and the inorganic nitrogen from chemical fertilizers constitute the total input of soil mineral nitrogen ( $N_{mf}$ ). Atmospheric nitrogen deposition, as another important external source of soil mineral nitrogen, was not considered for our study since there were few papers reporting it.

### Statistical analysis

The dataset in the current study is of unbalanced nature with observations collected from peer-reviewed papers rather than from systematically designed experiments. Accordingly, the effects of soil mineral nitrogen input and other variables on N<sub>2</sub>O flux were

analyzed using the mixed model-REML estimation method of SAS/MIXED procedure (version 9.3), which is suitable for handling unbalanced data. The values of N<sub>2</sub>O flux were first natural-log transformed to normalize their distribution and then analyzed by the following model:

$$\ln(f_{N_2O}) = \text{constant} + \ln(N_{mf}) + \text{pH} + \text{WT} + \text{NS}_i + \text{E cosys}_j \\ + \text{NS}_i \times \ln(N_{mf}) + \text{E cosys}_j \times \ln(N_{mf}) + \text{E cosys}_j \times \text{WT}$$

where  $f_{N_2O}$  is the N<sub>2</sub>O flux;  $N_{mf}$ , pH, WT,  $\text{NS}_i$  and  $\text{Ecosys}_j$  are the fixed effects of mineral nitrogen input, soil pH, water table level, nitrogen source ( $i$  is mineralized nitrogen only or a combination of mineralized nitrogen and inorganic nitrogen from chemical fertilizers), and ecosystem type ( $j$  is forest or non-forest type), respectively. A preliminary check of the data showed that the general trend of N<sub>2</sub>O flux in forest system differed from grass and cropland, so the ecosystems were simply classified into two subclasses as forest and non-forest. Some two-factor interactions were also included in the model. A significant level of  $p = 0.05$  was used to determine if a given variable or interactive effect was kept in the model to further seek solutions for fixed effects. Four negative values of N<sub>2</sub>O flux reported by Inubushi et al. [16] and Mojeremane et al. [17] can not be subjected to log-transformation and were not included in the analysis. In addition to determination coefficient (i.e.,  $R^2$  value), concordance between observed N<sub>2</sub>O fluxes and model fits was also analyzed using Lin's concordance correlation coefficient (CCC, Stata SE 12.0) to assess the goodness-of-fit of the finalized models. The resulting CCC was interpreted using the benchmarks described by Kleven et al. [18] as follows: <0.20 is considered virtually no agreement; 0.21–0.40 is considered slight; 0.41–0.60 is considered fair; 0.61–0.80 is considered moderate; and 0.81–0.99 is substantial.

## Results

As shown in Table 1, soil pH, soil mineral nitrogen source (NS) and ecosystem type did not affect the annual N<sub>2</sub>O flux ( $p > 0.05$ ), while the input of soil mineral nitrogen ( $N_{mf}$ ) and water table level (WT) had significant effects on N<sub>2</sub>O flux ( $p < 0.01$ ). The F value of  $N_{mf}$  was the biggest, indicating the input of soil mineral nitrogen was the main factor controlling N<sub>2</sub>O emission in organic soils. The two-factor interactive effects between NS,  $N_{mf}$ , WT and ecosystem type on N<sub>2</sub>O flux were not statistically significant ( $p > 0.05$ ).

Only the significant variables were then kept in the model to solve the estimates for their effects. Two models with different combinations of independent variables are shown in Table 2. The first model was the simplest one with  $N_{mf}$  as the single independent variable. The second model was expanded by adding the effect of water table level. The 95% confidence intervals of the estimated effect of  $N_{mf}$  were overlapped for different models. The models indicated that N<sub>2</sub>O flux was positively correlated with  $N_{mf}$  and negatively with water table level. Using the estimated effects and the variables in the dataset allowed a comparison between predicted and observed annual N<sub>2</sub>O fluxes from organic soils. The variable  $N_{mf}$  explained up to 69% of the variability in the overall data of observed N<sub>2</sub>O fluxes (Fig. 1), while the addition of water table level increased the explanatory ability to 75% (Fig. 2). When the overall data were further divided by ecosystem types, the performance of models was somewhat different (Fig. 1 & 2). For forest, the determination coefficient ( $R^2$ ) was nearly stable at the value of 0.63 for both models. In contrast, the introduction of water table level into models slightly improved the fitted results for

**Table 1.** Results of type III tests of fixed effects.

| Effect                    | Numerator DF | Denominator DF | F Value | Pr>F   |
|---------------------------|--------------|----------------|---------|--------|
| N <sub>mf</sub>           | 1            | 96             | 13.16   | 0.0005 |
| pH                        | 1            | 96             | 1.43    | 0.2344 |
| WT                        | 1            | 96             | 5.15    | 0.0255 |
| NS                        | 1            | 96             | 0.10    | 0.7472 |
| Ecosystem                 | 1            | 96             | 0.70    | 0.4040 |
| NS×N <sub>mf</sub>        | 1            | 96             | 0.11    | 0.7426 |
| WT×N <sub>mf</sub>        | 1            | 96             | 3.20    | 0.0767 |
| Ecosystem×N <sub>mf</sub> | 1            | 96             | 0.21    | 0.6506 |
| Ecosystem×WT              | 1            | 96             | 2.17    | 0.1437 |

N<sub>mf</sub>, the mineral nitrogen input to soil; WT, water table level; NS, the source of soil mineral nitrogen.  
doi:10.1371/journal.pone.0096572.t001

non-forest systems with R<sup>2</sup> values increasing from 0.59 to 0.69. This indicated that the input of mineral nitrogen was the most important predictor of N<sub>2</sub>O flux, while water table level was a weak predictor of N<sub>2</sub>O flux and appeared to be dependent on ecosystem type.

The slope of regression lines in Fig. 1 & 2 ranged from 0.50 to 0.75, indicating that the relationship strays from the ideal 1:1 line. Therefore the concordance correlation coefficient (CCC) between observed and predicted N<sub>2</sub>O fluxes was calculated to measure robustness of the models. For the overall data with log-transformation, the concordance was substantial with the CCC ranging from 0.82 to 0.86 for the two models. When the log-transformed data were converted to actual N<sub>2</sub>O fluxes, however, the cluster of fluxes greater than 15.0 kg N ha<sup>-1</sup> yr<sup>-1</sup> was found to be distinctly underestimated. The CCC for this cluster of data

ranged from -0.002 to 0.16 and showed virtually no agreement, suggesting that some important factors responsible for these high fluxes were not accounted for by the models. For the rest of the data (103 fluxes out of 118), the CCC (ranging from 0.63 to 0.68) still showed a moderate concordance.

The variable N<sub>mf</sub> in the models can be decomposed into soil heterotrophic respiration (R<sub>h</sub>), C/N ratio and inorganic nitrogen rate from chemical fertilizer (N<sub>f</sub>). The mixed procedure analysis indicated that each of these components of N<sub>mf</sub> had a significant influence on N<sub>2</sub>O flux (*p*<0.001), with R<sub>h</sub> and N<sub>f</sub> being positively related to N<sub>2</sub>O flux and C/N ratio negatively related to N<sub>2</sub>O flux. Soil carbon and nitrogen contents, which could replace the variable of C/N ratio, were also significantly negatively or positively correlated with N<sub>2</sub>O flux (*p*<0.001). The fitting efficiency between observed and predicted N<sub>2</sub>O fluxes by models

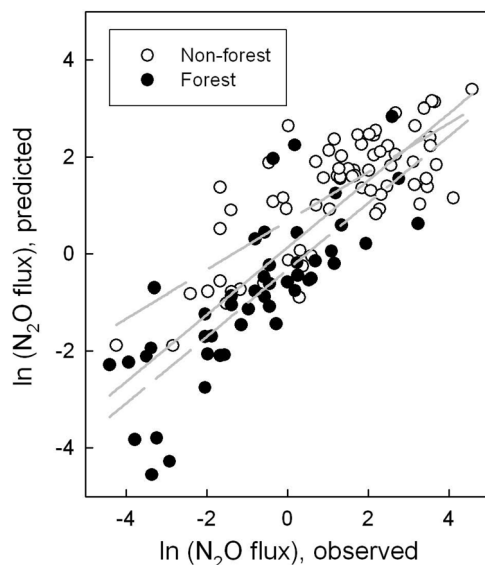

**Figure 1. Correlation of observed fluxes of N<sub>2</sub>O from organic soils and predicted values (kg N<sub>2</sub>O-N ha<sup>-1</sup>) by model 1 as presented in Table 2:  $\ln(\text{N}_2\text{O flux}) = 1.8685 \ln(\text{N}_{\text{mf}}) - 9.0314$ .** Solid line shows linear regression fit for the overall data:  $y = 0.69x + 0.13$ , R<sup>2</sup> = 0.69. Long-dashed line shows linear regression fit for the non-forest system:  $y = 0.50x + 0.68$ , R<sup>2</sup> = 0.59. Short-dashed line shows linear regression fit for the forest system:  $y = 0.69x - 0.33$ , R<sup>2</sup> = 0.63.  
doi:10.1371/journal.pone.0096572.g001

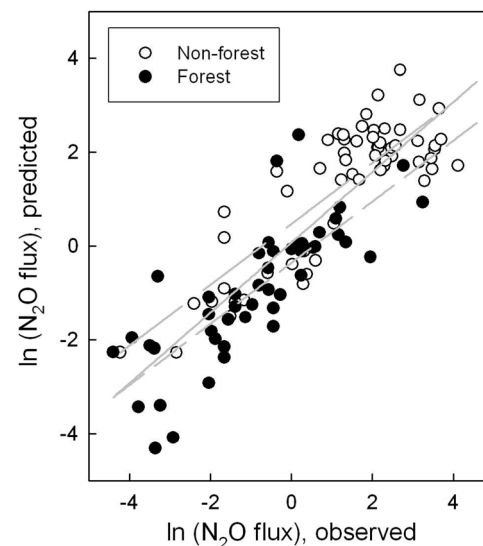

**Figure 2. Correlation of observed fluxes of N<sub>2</sub>O from organic soils and predicted values (kg N<sub>2</sub>O-N ha<sup>-1</sup>) by model 2 as presented in Table 2:  $\ln(\text{N}_2\text{O flux}) = 1.5374 \ln(\text{N}_{\text{mf}}) - 0.0221 \text{WT} - 8.2334$ .** Solid line shows linear regression fit for the overall data:  $y = 0.75x + 0.08$ , R<sup>2</sup> = 0.75. Long-dashed line shows linear regression fit for the non-forest system:  $y = 0.65x + 0.48$ , R<sup>2</sup> = 0.69. Short-dashed line shows linear regression fit for the forest system:  $y = 0.65x - 0.35$ , R<sup>2</sup> = 0.63.  
doi:10.1371/journal.pone.0096572.g002

**Table 2.** Solutions for fixed effects of the models with log-transformed N<sub>2</sub>O flux as dependent variable.

| Model | Effect                | Estimate | SE     | DF  | t Value | P> t   | 95% confidence |         |
|-------|-----------------------|----------|--------|-----|---------|--------|----------------|---------|
|       |                       |          |        |     |         |        | Lower          | Upper   |
| 1     | Intercept             | -9.0314  | 0.5952 | 116 | -15.17  | <.0001 | -10.2102       | -7.8526 |
|       | ln (N <sub>mf</sub> ) | 1.8685   | 0.1157 | 116 | 16.15   | <.0001 | 1.6393         | 2.0976  |
| 2     | Intercept             | -8.2334  | 0.6222 | 103 | -13.23  | <.0001 | -9.4675        | -6.9994 |
|       | ln (N <sub>mf</sub> ) | 1.5374   | 0.1479 | 103 | 10.39   | <.0001 | 1.2441         | 1.8308  |
|       | WT                    | -0.0221  | 0.0053 | 103 | -4.14   | <.0001 | -0.0326        | -0.0115 |

N<sub>mf</sub>, the mineral nitrogen input to soil (kg N ha<sup>-1</sup> yr<sup>-1</sup>); WT, water table level (cm).  
doi:10.1371/journal.pone.0096572.t002

using the above-mentioned components of N<sub>mf</sub> as inputs were nearly the same as those of models using N<sub>mf</sub> itself (data not shown).

## Discussion

Previous studies have linked N<sub>2</sub>O flux directly to either CO<sub>2</sub> flux or soil C/N ratio [5,8,9]. In this study, soil CO<sub>2</sub> emission and C/N ratio were combined to estimate mineral nitrogen input, and the latter accounted for up to 69% of the variability of N<sub>2</sub>O fluxes from organic soils with various properties, land management practices and climates. Soil CO<sub>2</sub> flux or C/N ratio alone explained only 49% and 36% of the overall variability of N<sub>2</sub>O fluxes, respectively (Fig. 3). This suggests the necessity of combining soil CO<sub>2</sub> flux and C/N ratio for predicting N<sub>2</sub>O flux on a large scale. Of course, soil CO<sub>2</sub> flux and C/N ratio can be independently incorporated into the same models, but the interpretation of such models would be relatively complicated and evasive since there are various mechanisms which may explain the control of CO<sub>2</sub> flux and C/N ratio over N<sub>2</sub>O flux [8,9,19]. In contrast, the quotient of soil CO<sub>2</sub> flux and C/N ratio can well represent in theory the gross nitrogen mineralization [20], and the implication of models using such a quotient as input is straightforward and self-evident in the importance of mineral nitrogen input for regulating soil N<sub>2</sub>O flux. There is no significant difference in the influence of different sources of mineral nitrogen on N<sub>2</sub>O flux (Table 1), suggesting that the simplified models might also be suitable for evaluating the effect of mineral nitrogen from other sources such as atmospheric deposition, though this idea needs further verification.

A negative relationship between N<sub>2</sub>O flux and groundwater level has been observed for individual sites [21,22], and still holds at a large scale as shown in this study. This is logical simply because high moisture with increasing water table level can limit N<sub>2</sub>O emission from soils due to the low availability of nitrate and/or efficient reduction of N<sub>2</sub>O to N<sub>2</sub> through denitrification [16,23], while the lowering of water table increases oxygen penetration into the peat and enhances the decomposition of organic matter, as indicated by the negative relationship between heterotrophic respiration and water table level (R<sup>2</sup> = 0.31, *p* < 0.0001). It has been reported that the control of soil water content or water table level over N<sub>2</sub>O flux is important only when soil is not nitrogen limiting [24,25]. In this study, the percentage of observations with N<sub>mf</sub> greater than 150 kg N ha<sup>-1</sup> was only 19% for forest, but up to 87% for non-forest systems (Table S1). This suggests that forest soil is nitrogen limiting when compared with non-forest systems, which may be responsible for the insensitivity of N<sub>2</sub>O flux to water table level for forest systems (Fig. 1 & 2). Besides the input of mineral nitrogen, forest differs from non-forest systems in many other factors, such as vegetation, below-/above-ground biomass, litter fall, soil compaction, and land management practices, all of which can influence N<sub>2</sub>O flux but are not considered here due to limited and unsystematic information in literature sources of the current dataset. To fill the gap, ecosystem type was used as a proxy variable that we tried to incorporate into models; however, statistical analysis showed that its effect was not significant (Table 1).

It should be acknowledged that the models described here were dependent on simplifying assumptions that can introduce error. That is, the gross nitrogen mineralization was estimated from carbon mineralization and soil C/N ratio by assuming that the rate of carbon mineralization is the same as the rate of respiration and the C/N ratio of mineralized organic matter is the same as that of the bulk soil organic matter. In fact, carbon and nitrogen mineralization from soils originates from decomposable fractions

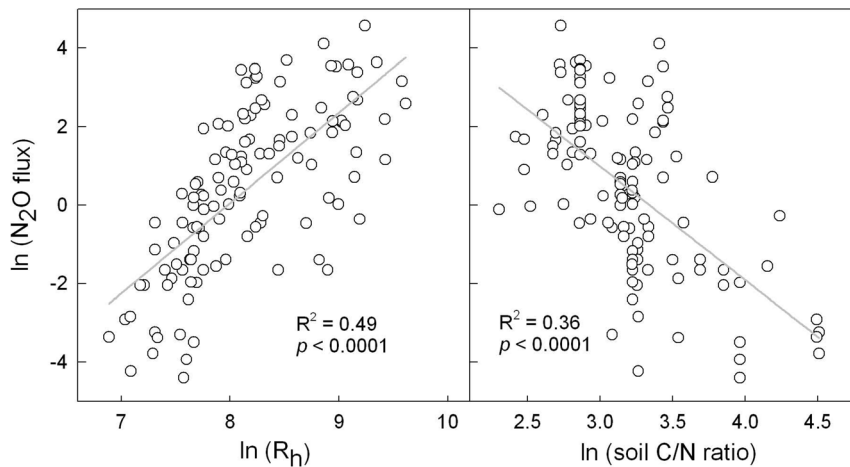

**Figure 3. Correlation of observed fluxes of N<sub>2</sub>O with estimated soil heterotrophic respiration (R<sub>h</sub>, left panel) and C/N ratio (right panel).**

doi:10.1371/journal.pone.0096572.g003

of organic matter with different C/N ratios [26]. Most likely, the ratio of carbon evolved/nitrogen mineralized is much wider than the bulk soil carbon to nitrogen ratio [27,28]. This indicates that gross nitrogen mineralization might be over- or under-estimated if bulk soil C/N ratio was used in equation 2. The respiration process is also not exactly identical to carbon mineralization. The amount of carbon that is ultimately lost through respiration depends on how effectively the decomposer community converts mineralized carbon to biomass [29]. Similarly, the amount of nitrogen that is ultimately available to denitrifier or nitrifier for producing N<sub>2</sub>O depends on how effectively the decomposer community converts mineralized nitrogen to biomass and plants compete with microbes for mineral nitrogen [10,20]. Empirical relationships have been established between nitrogen and carbon mineralization in studies performed usually under laboratory conditions [30]. Different organic matter fractions or their C/N ratios, and varying microbial use efficiency of carbon and nitrogen have also been proposed to predict nitrogen release [20,29]. However, these relationships are strongly dependent on the experimental conditions in which they have been established. Moreover, the current dataset is based on the in situ measurements in the field environment and contains only the basic information of respiratory carbon and bulk soil C/N ratio, thus necessitating the above-mentioned assumptions to estimate mineralized nitrogen. Such simplifications and assumptions may bring uncertainties, but it is necessary in some cases to understand the general trends and probabilistic nature of the environment [31].

N<sub>2</sub>O emission from soils is of small magnitude and highly variable in space and time, and is thus very difficult to estimate. The measurement of soil N<sub>2</sub>O flux also requires intricate techniques along with a lot of time and labor. In contrast, soil CO<sub>2</sub> emission is controlled primarily by soil temperature and moisture, and is relatively easy to measure or predict [32,33]. In addition, the estimates of soil respiration are currently more widely available than those of soil N<sub>2</sub>O emission. The models developed in this study showed a promising approach to estimating N<sub>2</sub>O emission from organic soils by using soil C/N ratio and CO<sub>2</sub> emission data derived from measurements or biogeochemical modeling. It should be mentioned, however, that several aspects of the information in the current dataset might impose uncertainties on these models. First, soil heterotrophic respiration was simply estimated from total soil respiration using a universal relationship

between them [15], but the relative contribution of organic matter decomposition or heterotrophic respiration would vary over time and depend on root respiration of the growing plants [8]. Second, the majority of the global organic soils are distributed in the boreal and sub-arctic regions and about 10%–15% in the tropical countries [1,3], but most of the current data came from northern Europe, indicating that the models developed in the present study might be biased to the temperate regions.

## Conclusion

A fairly large number of data were collected to explore the relationship between annual N<sub>2</sub>O emission and multiple variables for organic soil by a mixed-model analysis, and the input of soil mineral nitrogen was found to be the most useful predictor for N<sub>2</sub>O flux. Soil mineral nitrogen was supposed to be composed of organic nitrogen mineralization as estimated by CO<sub>2</sub> emission and soil C/N ratio, thus providing a possibility for upscaling N<sub>2</sub>O emission from organic soils by use of regional soil databases including information on C/N ratio and carbon storage change or CO<sub>2</sub> emission data. The approach proposed here may have validity as a whole, but needs further evaluation and advancement before practical application due to uncertainties associated with simplifying assumptions and a regionally unbalanced data source. A better understanding of the processes of carbon and nitrogen mineralization and their stoichiometric relationship as well as additional experimental data from organic soils outside of temperate Europe regions will help to improve the relationship established in this study.

## Supporting Information

**Table S1 Annual emissions of N<sub>2</sub>O and CO<sub>2</sub> from organic soils and estimates of soil mineral nitrogen input.**

(XLS)

## Author Contributions

Conceived and designed the experiments: ZJM. Performed the experiments: ZJM AYH. Analyzed the data: ZJM. Contributed reagents/materials/analysis tools: JPN DTX. Wrote the paper: ZJM.

## References

- Page SE, Rieley J, Banks CJ (2011) Global and regional importance of the tropical peatland carbon pool. *Global Change Biol* 17: 798–818.
- Goldberg SD, Knorr KH, Blodau C, Lischeid G, Gebauer G (2010) Impact of altering the water table height of an acidic fen on N<sub>2</sub>O and NO fluxes and soil concentrations. *Global Change Biol* 16: 220–233.
- Frolking S, Talbot J, Jones MC, Treat CC, Kauffman JB, et al. (2011) Peatlands in the Earth's 21<sup>st</sup> century climate system. *Environ Rev* 19: 371–396.
- Maljanen M, Sigurdsson BD, Guðmundsson J, Óskarsson H, Huttunen JT, et al. (2010) Greenhouse gas balances of managed peatlands in the Nordic countries – present knowledge and gaps. *Biogeosciences* 7: 2711–2738.
- Garcia-Montiel DC, Melillo JM, Steudler PA, Neill C, Feigl BJ, et al. (2002) Relationship between N<sub>2</sub>O and CO<sub>2</sub> emissions from the Amazon Basin. *Geophys Res Lett* 29: Art.No. 1090.
- Chatskikh D, Olesen JE (2007) Soil tillage enhanced CO<sub>2</sub> and N<sub>2</sub>O emissions from loamy sand soil under spring barley. *Soil Till Res* 97: 5–18.
- Keller M, Varner R, Dias JD, Silva H, Crill P, et al. (2005) Soil–atmosphere exchange of nitrous oxide, nitric oxide, methane, and carbon dioxide in logged and undisturbed forest in the Tapajós national forest, Brazil. *Earth Interact* 9: Art. No. 23.
- Xu XF, Tian HQ, Hui DF (2008) Convergence in the relationship of CO<sub>2</sub> and N<sub>2</sub>O exchanges between soil and atmosphere within terrestrial ecosystems. *Global Change Biol* 14: 1651–1660.
- Klemetsson L, Von Arnold K, Weslien P, Gundeersen P (2005) Soil CN ratio as a scalar parameter to predict nitrous oxide emissions. *Global Change Biol* 11: 1142–1147.
- Luxhøi J, Bruun S, Stenberg B, Breland TA, Jensen LS (2006) Prediction of gross and net nitrogen mineralization-immobilization-turnover from respiration. *Soil Sci Soc Am J* 70: 1121–1128.
- Bengtsson G, Bengtson P, Månsson KF (2003) Gross nitrogen mineralization-, immobilization-, and nitrification rates as a function of soil C/N ratio and microbial activity. *Soil Biol Biochem* 35: 143–154.
- Ojanen H, Minkkinen K, Alm J, Penttilä T (2010) Soil – atmosphere CO<sub>2</sub>, CH<sub>4</sub> and N<sub>2</sub>O fluxes in boreal forestry-drained peatlands. *Forest Ecol Manage* 260: 411–421.
- Mu ZJ, Huang AY, Kimura SD, Jin T, Wei SQ, et al. (2009) Linking N<sub>2</sub>O emission to soil mineral N as estimated by CO<sub>2</sub> emission and soil C/N ratio. *Soil Biol Biochem* 41: 2593–2597.
- Hanson PJ, Edwards NT, Garten CT, Andrews JA (2000) Separating root and soil microbial contributions to soil respiration: A review of methods and observations. *Biogeochemistry* 48: 115–146.
- Bond-Lamberty B, Thomson A (2010) A global database of soil respiration data. *Biogeosciences* 7: 1915–1926.
- Inubushi K, Furukawa Y, Hadi A, Purnomo E, Tsuruta H (2003) Seasonal changes of CO<sub>2</sub>, CH<sub>4</sub> and N<sub>2</sub>O fluxes in relation to land-use change in tropical peatlands located in coastal area of South Kalimantan. *Chemosphere* 52: 603–608.
- Mojeremane W, Rees RM, Mencuccini M (2012) The effects of site preparation practices on carbon dioxide, methane and nitrous oxide fluxes from a peaty gley soil. *Forestry* 85: 1–15.
- Klevens J, Trick WE, Kee R, Angulo F, Garcia D, et al. (2011) Concordance in the measurement of quality of life and health indicators between two methods of computer-assisted interviews: self-administered and by telephone. *Qual Life Res* 20: 1179–1186.
- Rochette P, Tremblay N, Fallon E, Angers DA, Chantigny MH, et al. (2010) N<sub>2</sub>O emissions from an irrigated and non-irrigated organic soil in eastern Canada as influenced by N fertilizer addition. *Eur J Soil Sci* 61: 186–196.
- Murphy DV, Recous S, Stockdale EA, Fillery IRP, Jensen LS, et al. (2003) Gross nitrogen fluxes in soil: Theory, measurement and application of <sup>15</sup>N pool dilution techniques. *Adv Agron* 79: 69–118.
- Regina K, Silvola J, Martikainen PJ (1999) Short-term effects of changing water table on N<sub>2</sub>O fluxes from peat monoliths from natural and drained boreal peatlands. *Global Change Biol* 5: 183–189.
- Danevcic T, Mandic-Mulec I, Stres B, Stopar D, Hacin J (2010) Emissions of CO<sub>2</sub>, CH<sub>4</sub> and N<sub>2</sub>O from southern European peatlands. *Soil Biol Biochem* 42: 1437–1446.
- Maljanen M, Shurpali N, Hytönen J, Mäkiranta P, Aro L, et al. (2012) Afforestation does not necessarily reduce nitrous oxide emissions from managed boreal peat soils. *Biogeochemistry* 108: 199–218.
- Smith KA, Thomson PE, Clayton PE, McTaggart IP, Conen F (1998) Effects of temperature, water content and nitrogen fertilization on emissions of nitrous oxide by soil. *Atmos Environ* 32: 3301–3309.
- Weslien P, Klemetsson AK, Borjesson G, Klemetsson L (2009) Strong pH influence on N<sub>2</sub>O and CH<sub>4</sub> fluxes from forested organic soils. *Eur J Soil Sci* 60: 311–320.
- Springob G, Kirchmann H (2003) Bulk soil C to N ratio as a simple measure of net N mineralization from stabilized soil organic matter in sandy arable soils. *Soil Biol Biochem* 35: 629–632.
- Sollins P, Spycher G, Glassman CA (1984) Net nitrogen mineralization from light- and heavy-fraction forest soil organic matter. *Soil Biol Biochem* 16: 31–37.
- Kader MA, Sleutel S, Begum SA, D'Haene K, Jegajeevagan K, et al. (2010) Soil organic matter fractionation as a tool for predicting nitrogen mineralization in silty arable soils. *Soil Use Manage* 26: 494–507.
- Manzoni S, Taylor P, Richter A, Porporato A, Ågren GI (2012) Environmental and stoichiometric controls on microbial carbon-use efficiency in soils. *New Phytol* 196: 79–91.
- Nicolardot B, Recous S, Mary B (2001) Simulation of C and N mineralization during crop residue decomposition: a simple dynamic model based on the C:N ratio of the residues. *Plant Soil* 228: 83–103.
- Yan XY, Yagi K, Akiyama H, Akimoto H (2005) Statistical analysis of the major variables controlling methane emission from rice fields. *Global Change Biol* 11: 1131–1141.
- Lloyd J, Taylor JA (1994) On the temperature-dependence of soil respiration. *Funct Ecol* 8: 315–323.
- Raich JW, Potter CS, Bhagawati D (2002) Interannual variability in global soil respiration, 1984–94. *Global Change Biol* 8: 800–812.
